# Supplementary material
Source: publisher site journal article supplement (https://www.dovepress.com/article/414758)
Supplement: Supplementary file 1 [file get_supplementary_file.php]

**Supplementary experiment 1.** Analysis of mDexos cytotoxicity

B16-F10 cells in logarithmic growth phase were seeded into a 96-well plate at a density of 1×104 cells/100 μl and cultured at 37°C and 5% CO2 under saturated humidity for 12 hours. The supernatant was discarded. MDexos were diluted with complete medium to different concentrations of 0, 0.004, 0.02, 0.1, 0.2, 1, 2.1, 4.2 and 8.4 μg/L. Then, 100 μl of the mixture was added to each well, with six replicate wells prepared in parallel for each condition, and the cells were incubated at 37 °C and 5% CO2 under saturated humidity for 48 hours. Then, 10 μl of CCK-8 reagent was added to each well 2 hours before the end of the incubation period. After incubation, the absorbance at 450 nm was measured using a multipurpose microplate reader.

As shown in Supplementary Figure 1, mDexos had no significant cytotoxic effect on B16-F10 cells.


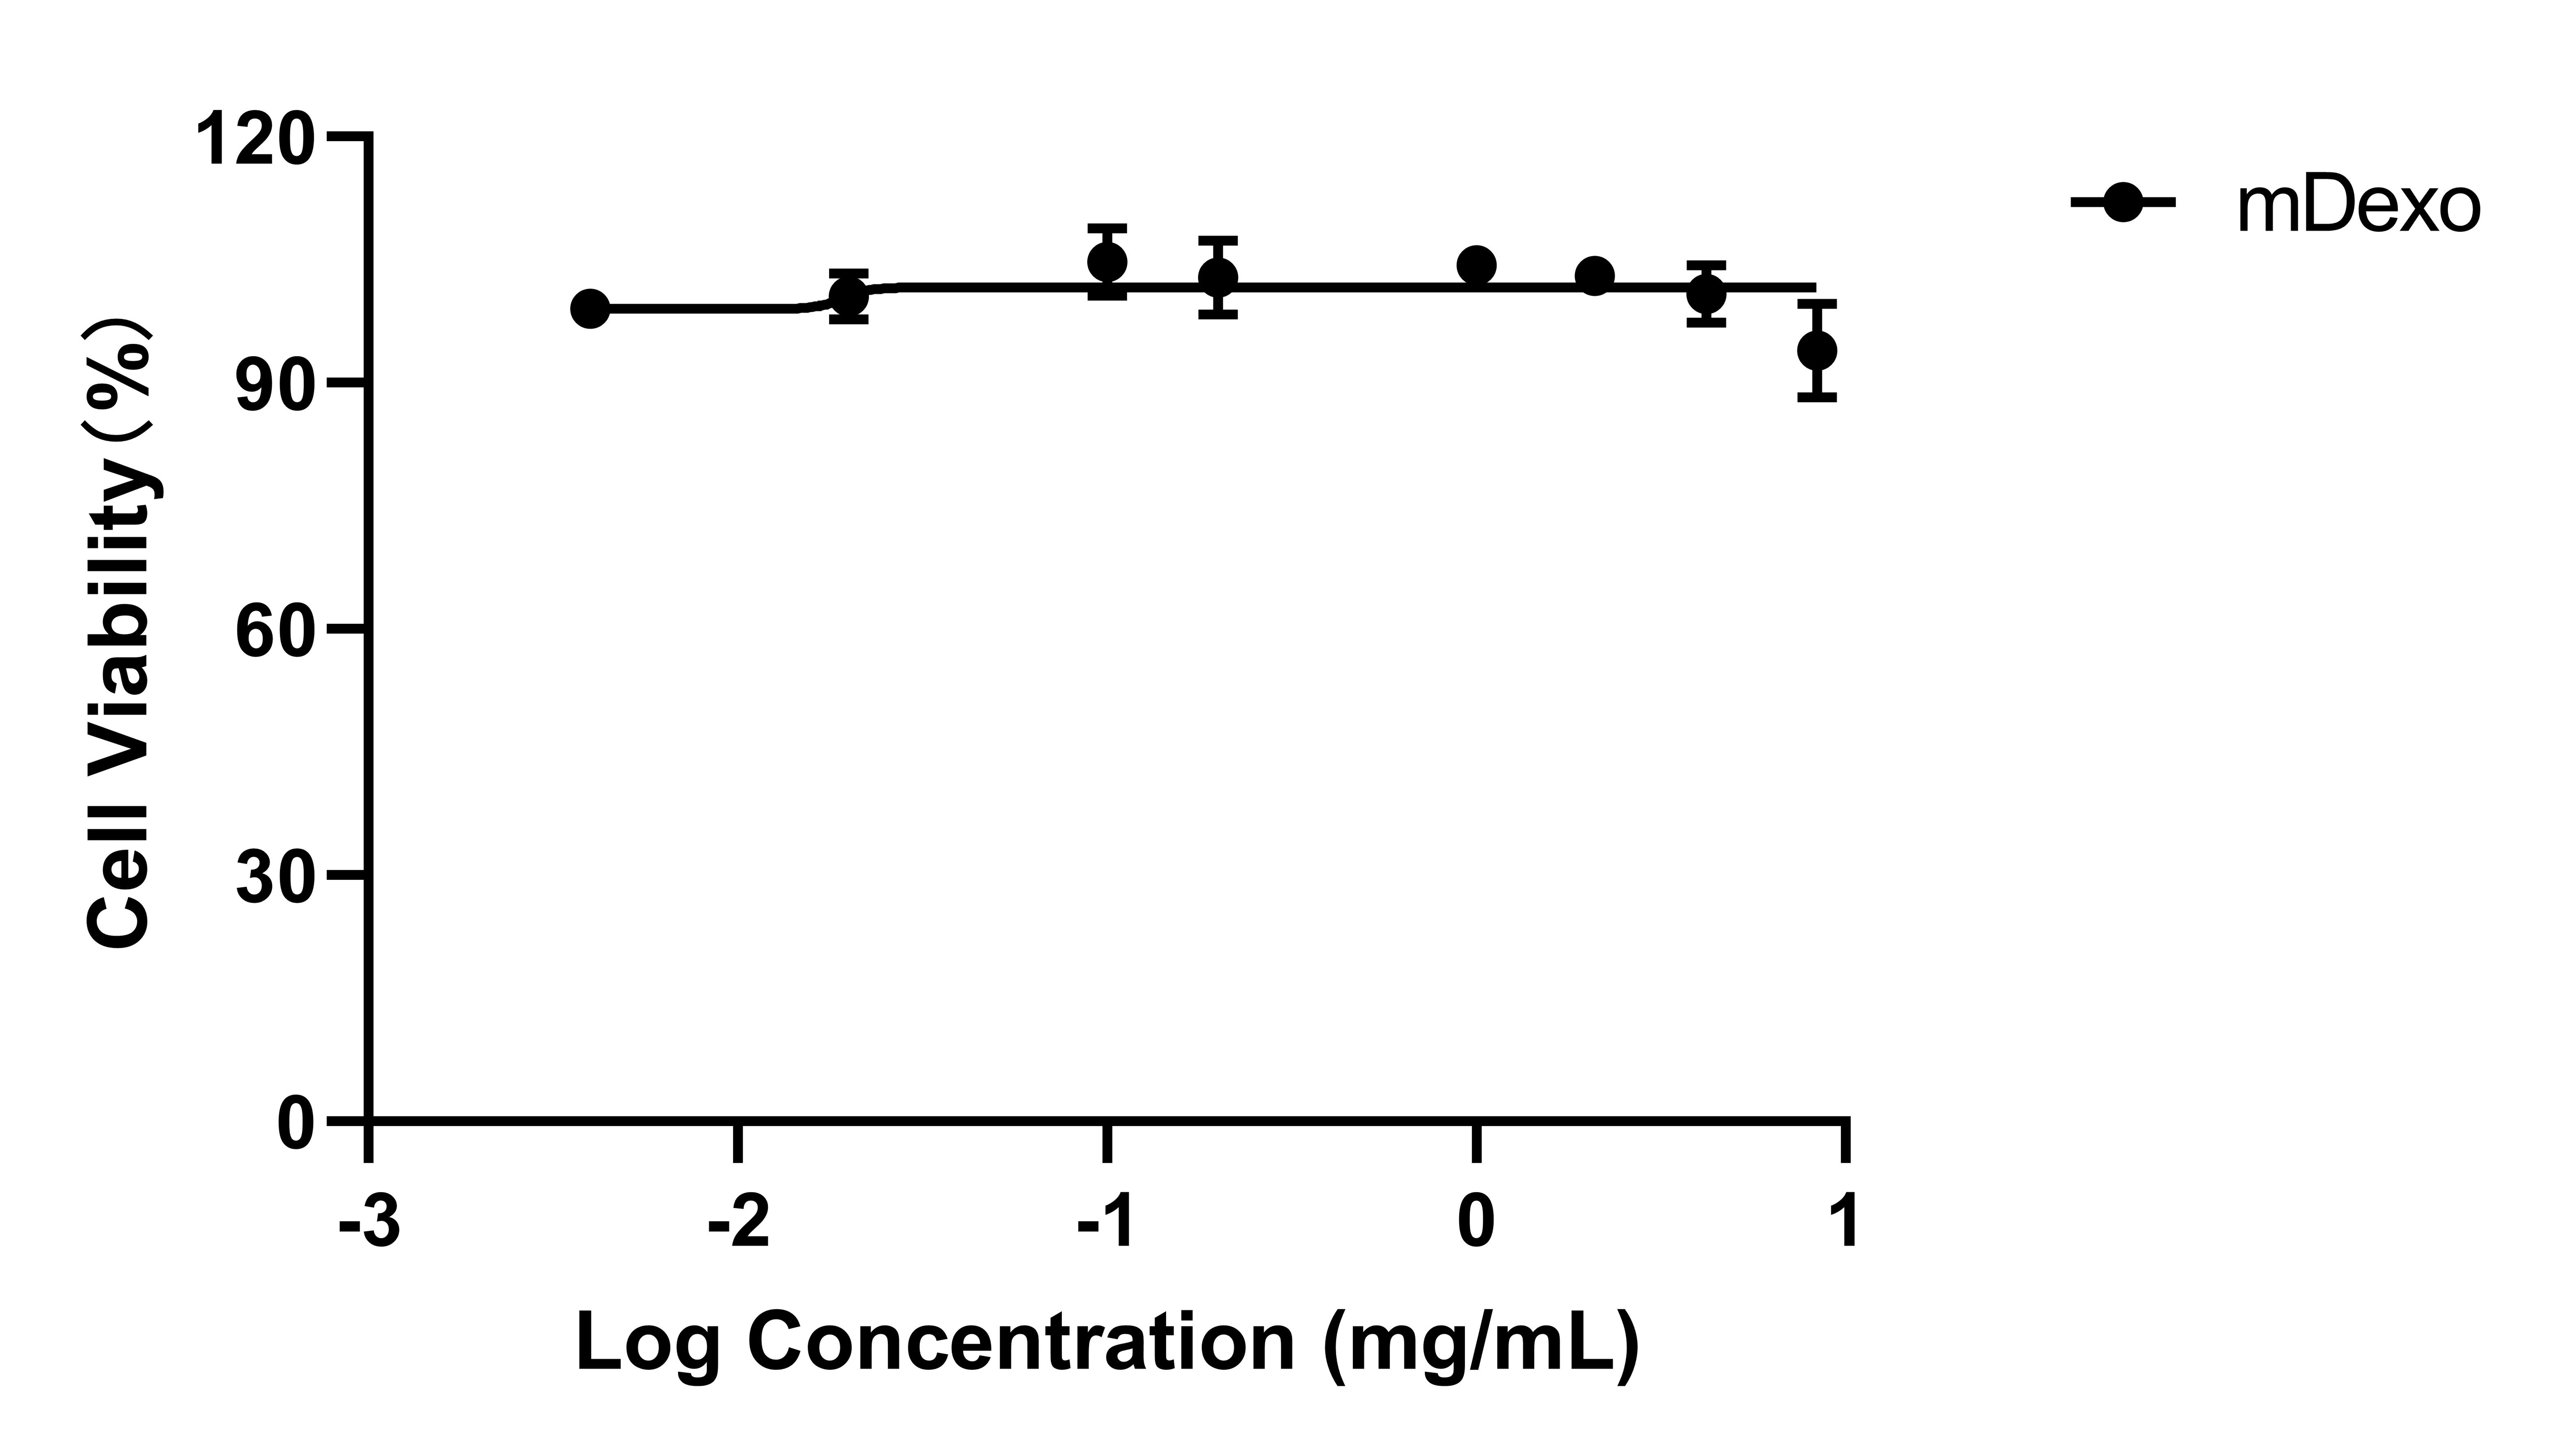


**Supplementary Figure 1:** Cytotoxicity of mDexos. Data are reported as the mean ± standard deviation (n=6), one-way ANOVA.
